# Supplementary material
Source: ML conference proceedings conference paper supplement (https://openreview.net/forum?id=-ShKZHg0Md9)
Supplement: supplementary_material [file attachment]

---

# Supplementary for Locally Regularized Sparse Graph by Fast Proximal Gradient Descent

---

Dongfang Sun, Yingzhen Yang<sup>1</sup>

<sup>1</sup>School of Computing and Augmented Intelligence, Arizona State University, Tempe, AZ 85281, USA ,  
{dsun30, yingzhen.yang}@asu.edu

## 1 PROOFS AND MORE TECHNICAL RESULTS

**Proposition 1.1.** Define  $\mathcal{C}^+ = \{t: 1 \leq t \leq n, c_{ti} > 0\}$ , and  $\mathcal{C}^- = \{t: 1 \leq t \leq n, c_{ti} < 0\}$ . Let  $\mathbf{z}^*$  be a critical point of function  $\tilde{F}$  in eq.(7) of the main paper. Then for arbitrary small positive number  $\varepsilon > 0$ ,  $\tilde{\mathbf{z}}^{*,\varepsilon} \in \mathbb{R}^n$  defined by

$$\tilde{\mathbf{z}}_k^{*,\varepsilon} = \begin{cases} \mathbf{z}_k^* & \text{if } \mathbf{z}_k^* \neq 0 \text{ or } k \in \mathcal{C}^+ \\ \varepsilon & \text{otherwise} \end{cases} \quad (1)$$

Then there exists  $\mathbf{u} \in \tilde{\partial}F(\tilde{\mathbf{z}}_k^{*,\varepsilon})$  for  $F$  in eq.(6) of the main paper such that  $\|\mathbf{u}\|_2 \leq L_f|\mathcal{C}|\varepsilon$  where  $L_f := 2\sigma_{\max}(\mathbf{X}^\top \mathbf{X})$ .

*Proof.* Since the only different elements between  $\tilde{\mathbf{z}}^{*,\varepsilon}$  and  $\mathbf{z}^*$  are those with indices in  $\mathcal{A} = \mathcal{C}^{-1} \cap \{k: \mathbf{z}_k^* = 0\}$ , we have

$$\|\nabla f(\tilde{\mathbf{z}}^*) - \nabla f(\mathbf{z}^*)\|_2 \leq L_f \|\tilde{\mathbf{z}}^* - \mathbf{z}^*\|_2 \leq L_f |\mathcal{C}^{-1}| \varepsilon,$$

where  $L_f = 2\sigma_{\max}(\mathbf{X}^\top \mathbf{X})$ . Because  $\mathbf{z}^*$  be a critical point of function  $\tilde{F}$ , there exists  $\mathbf{q} \in \tilde{\partial}h_{\gamma,c}$  such that  $\mathbf{p} := \nabla f(\mathbf{z}^*) + \mathbf{q} = \mathbf{0}$ . Define  $\tilde{h}_{\gamma,c} = \gamma \sum_{k=1}^n c_{ki} \mathbb{1}_{\mathbf{z}_k^i \neq 0}$ . With the definition of  $\tilde{\mathbf{z}}^{*,\varepsilon}$ , we have  $\tilde{\mathbf{q}} \in \tilde{\partial}\tilde{h}_{\gamma,c}(\tilde{\mathbf{z}}^{*,\varepsilon})$  such that  $\tilde{\mathbf{q}}_k = 0$  for  $k \in \mathcal{A}$  and  $\tilde{\mathbf{q}}_k = \mathbf{q}_k$  otherwise. Moreover,  $\mathbf{q}_k = 0$  for all  $k \in \mathcal{A}$ .

Therefore, let  $\tilde{\mathbf{p}} \triangleq \nabla f(\tilde{\mathbf{z}}^{*,\varepsilon}) + \tilde{\mathbf{q}} \in \partial F(\tilde{\mathbf{z}}^{*,\varepsilon})$ , we have

$$\|\tilde{\mathbf{p}}\|_2 = \|\tilde{\mathbf{p}} - \mathbf{p}\|_2 = \|\nabla f(\tilde{\mathbf{z}}^*) - \nabla f(\mathbf{z}^*)\|_2 \leq L_f |\mathcal{C}^{-1}| \varepsilon.$$

The claim of this proposition follows with  $\mathbf{u} = \tilde{\mathbf{p}}$ . □

We repeat critical equations in the main paper and define more notations before stating the proof of Theorem 3.2.

$$\text{prox}_{sh_{\gamma,c}}(\mathbf{u}) := \arg \min_{\mathbf{v} \in \mathbb{R}^n, \mathbf{v}_i=0} \frac{1}{2s} \|\mathbf{v} - \mathbf{u}\|_2^2 + h_{\gamma,c}(\mathbf{z}) = T_{s,\gamma,c}(\mathbf{u}),$$

where  $s > 0$  is the step size,  $T_{s,\gamma,c}$  is an element-wise hard thresholding operator. For  $1 \leq t \leq n$ ,

$$[T_{s,\gamma,c}(\mathbf{u})]_t = \begin{cases} 0 & : |\mathbf{u}_t| \leq \sqrt{2s\gamma c_{ti}} \text{ and } c_{ti} > 0, \text{ or } t = i \\ \mathbf{u}_t & : \text{otherwise} \end{cases} \quad (2)$$

## 1.1 PROOF OF THEOREM 3.2

**Proof of Theorem 3.2.** First of all, it can be verified that  $\text{supp}(\mathbf{z}_c^{(k)}) \subseteq \text{supp}(\mathbf{z}_c^{(k-1)})$  for all  $k \geq 1$  when  $s < \frac{2\tau}{C^2}$ . Therefore, there exists a finite  $k' \geq 1$  such that  $\{\mathbf{z}_c^{(k)}\}_{k \geq k'}$  have the same support  $\mathcal{S}$ . We note that  $\lambda$  can be also be slightly adjusted so that  $\text{supp}(\mathbf{v}_c^{(k)}) = \mathcal{S}$  for all  $k \geq k_0$ . Now we consider any  $k > k'$  in the sequel, and let  $\mathbf{z} \in \mathbb{R}^n$  be a vector such that  $\text{supp}(\mathbf{z}_c) = \mathcal{S}$ .

Because  $f$  have  $L_f$ -Lipschitz continuous gradient, we have

$$f(\mathbf{z}^{(k)}) \leq f(\mathbf{m}^{(k)}) + \langle \nabla f(\mathbf{m}^{(k)}), \mathbf{z}^{(k)} - \mathbf{m}^{(k)} \rangle + \frac{L_f}{2} \|\mathbf{z}^{(k)} - \mathbf{m}^{(k)}\|_2^2. \quad (3)$$

Also,

$$\begin{aligned} & f(\mathbf{m}^{(k)}) - (1 - \alpha_k)f(\mathbf{z}^{(k-1)}) - \alpha_k f(\mathbf{z}) \\ &= (1 - \alpha_k) \left( f(\mathbf{m}^{(k)}) - f(\mathbf{z}^{(k-1)}) \right) + \alpha_k \left( f(\mathbf{m}^{(k)}) - f(\mathbf{z}) \right) \\ &\stackrel{\textcircled{1}}{\leq} (1 - \alpha_k) \langle \nabla f(\mathbf{m}^{(k)}), \mathbf{m}^{(k)} - \mathbf{z}^{(k-1)} \rangle + \alpha_k \langle \nabla f(\mathbf{m}^{(k)}), \mathbf{m}^{(k)} - \mathbf{z} \rangle \\ &\leq \langle \nabla f(\mathbf{m}^{(k)}), (1 - \alpha_k)(\mathbf{m}^{(k)} - \mathbf{z}^{(k-1)}) + \alpha_k(\mathbf{m}^{(k)} - \mathbf{z}) \rangle \\ &= \langle \nabla f(\mathbf{m}^{(k)}), \mathbf{m}^{(k)} - (1 - \alpha_k)\mathbf{z}^{(k-1)} - \alpha_k\mathbf{z} \rangle, \end{aligned} \quad (4)$$

where  $\textcircled{1}$  is due to the convexity of  $f$ .

We have  $\tilde{\mathbf{v}}^{(k)} = \mathbf{v}^{(k-1)} - \lambda_k \nabla f(\mathbf{m}^{(k)})$ , and it follows that

$$\begin{aligned} & \frac{1}{2\lambda_k} \left( \|\mathbf{v}^{(k-1)} - \mathbf{z}\|_2^2 - \|\mathbf{v}^{(k)} - \mathbf{z}\|_2^2 - \|\mathbf{v}^{(k)} - \mathbf{v}^{(k-1)}\|_2^2 \right) \\ &= \frac{1}{\lambda_k} \langle \mathbf{z} - \mathbf{v}^{(k)}, \mathbf{v}^{(k)} - \mathbf{v}^{(k-1)} \rangle \\ &\stackrel{\textcircled{1}}{=} \frac{1}{\lambda_k} \langle \mathbf{z} - \mathbf{v}^{(k)}, \tilde{\mathbf{v}}^{(k)} - \mathbf{v}^{(k-1)} \rangle \\ &= \langle \nabla f(\mathbf{m}^{(k)}), \mathbf{v}^{(k)} - \mathbf{z} \rangle, \end{aligned} \quad (5)$$

and  $\textcircled{1}$  is due to the fact that  $\text{supp}(\mathbf{z}_c - \mathbf{v}_c^{(k)}) \subseteq \mathcal{S}$  because  $\text{supp}(\mathbf{z}_c) = \mathcal{S}$ ,  $\text{supp}(\mathbf{v}_c^{(k)}) \subseteq \mathcal{S}$ .

Because  $\text{supp}(\mathbf{v}_c^{(k)}) \subseteq \text{supp}(\mathbf{z}_c)$ , we have

$$h_{\gamma,c}(\mathbf{v}^{(k)}) \leq h_{\gamma,c}(\mathbf{z}). \quad (6)$$

It follows by (5) and (6) that

$$\begin{aligned} & \langle \nabla f(\mathbf{m}^{(k)}), \mathbf{v}^{(k)} - \mathbf{z} \rangle + h_{\gamma,c}(\mathbf{v}^{(k)}) \\ &\leq h_{\gamma,c}(\mathbf{z}) + \frac{1}{2\lambda_k} \left( \|\mathbf{v}^{(k-1)} - \mathbf{z}\|_2^2 - \|\mathbf{v}^{(k)} - \mathbf{z}\|_2^2 - \|\mathbf{v}^{(k)} - \mathbf{v}^{(k-1)}\|_2^2 \right) \end{aligned} \quad (7)$$

Similar to (5), we have

$$\frac{1}{2s} \left( \|\mathbf{m}^{(k)} - \mathbf{z}\|_2^2 - \|\mathbf{z}^{(k)} - \mathbf{z}\|_2^2 - \|\mathbf{z}^{(k)} - \mathbf{m}^{(k)}\|_2^2 \right) = \frac{1}{s} \langle \mathbf{z} - \mathbf{z}^{(k)}, \mathbf{z}^{(k)} - \mathbf{m}^{(k)} \rangle. \quad (8)$$

For any  $\mathbf{q} \in \partial h_{\gamma,c}(\mathbf{z}^{(k)})$ , due to the fact that  $\text{supp}(\mathbf{z}_c) = \text{supp}(\mathbf{z}_c^{(k)})$ ,

$$\langle \mathbf{z} - \mathbf{z}^{(k)}, \mathbf{q} \rangle + h_{\gamma,c}(\mathbf{z}^{(k)}) = h_{\gamma,c}(\mathbf{z}). \quad (9)$$

By (8) and (9),

$$\begin{aligned} & \langle \mathbf{z} - \mathbf{z}^{(k)}, \frac{1}{s}(\mathbf{z}^{(k)} - \mathbf{m}^{(k)}) + \mathbf{q} \rangle + h_{\gamma,c}(\mathbf{z}^{(k)}) \\ &= h_{\gamma,c}(\mathbf{z}) + \frac{1}{2s} \left( \|\mathbf{m}^{(k)} - \mathbf{z}\|_2^2 - \|\mathbf{z}^{(k)} - \mathbf{z}\|_2^2 - \|\mathbf{z}^{(k)} - \mathbf{m}^{(k)}\|_2^2 \right) \end{aligned} \quad (10)$$

By the optimality condition of the proximal mapping in eq.(10) in Algorithm 1, we can choose  $\mathbf{q} \in \partial h_{\gamma,c}(\mathbf{z}^{(k)})$  such that  $\mathbf{z}^{(k)} = \mathbf{m}^{(k)} - s(\nabla f(\mathbf{m}^{(k)}) + \mathbf{q})$ . Plugging such  $\mathbf{q}$  in (10), we have

$$\langle \nabla f(\mathbf{m}^{(k)}), \mathbf{z}^{(k)} - \mathbf{z} \rangle + h_{\gamma,c}(\mathbf{z}^{(k)}) = h_{\gamma,c}(\mathbf{z}) + \frac{1}{2s} \left( \|\mathbf{m}^{(k)} - \mathbf{z}\|_2^2 - \|\mathbf{z}^{(k)} - \mathbf{z}\|_2^2 - \|\mathbf{z}^{(k)} - \mathbf{m}^{(k)}\|_2^2 \right) \quad (11)$$

Setting  $\mathbf{z} = (1 - \alpha_k)\mathbf{z}^{(k-1)} + \alpha_k\mathbf{v}^{(k)}$  in (11), we have

$$\begin{aligned} & \langle \nabla f(\mathbf{m}^{(k)}), \mathbf{z}^{(k)} - (1 - \alpha_k)\mathbf{z}^{(k-1)} - \alpha_k\mathbf{v}^{(k)} \rangle + h_{\gamma,c}(\mathbf{z}^{(k)}) \\ & \leq h_{\gamma,c}((1 - \alpha_k)\mathbf{z}^{(k-1)} + \alpha_k\mathbf{v}^{(k)}) + \frac{1}{2s} \left( \|\mathbf{m}^{(k)} - (1 - \alpha_k)\mathbf{z}^{(k-1)} - \alpha_k\mathbf{v}^{(k)}\|_2^2 - \|\mathbf{z}^{(k)} - \mathbf{m}^{(k)}\|_2^2 \right) \\ & \stackrel{\textcircled{1}}{\leq} (1 - \alpha_k)h_{\gamma,c}(\mathbf{z}^{(k-1)}) + \alpha_k h_{\gamma,c}(\mathbf{v}^{(k)}) \\ & \quad + \frac{1}{2s} \left( \|\mathbf{m}^{(k)} - (1 - \alpha_k)\mathbf{z}^{(k-1)} - \alpha_k\mathbf{v}^{(k)}\|_2^2 - \|\mathbf{z}^{(k)} - \mathbf{m}^{(k)}\|_2^2 \right) \\ & \stackrel{\textcircled{2}}{\leq} (1 - \alpha_k)h_{\gamma,c}(\mathbf{z}^{(k-1)}) + \alpha_k h_{\gamma,c}(\mathbf{v}^{(k)}) + \frac{1}{2s} \left( \alpha_k^2 \|\mathbf{v}^{(k)} - \mathbf{v}^{(k-1)}\|_2^2 - \|\mathbf{z}^{(k)} - \mathbf{m}^{(k)}\|_2^2 \right), \end{aligned} \quad (12)$$

where  $\textcircled{1}$  is due to the fact that  $\text{supp}(\mathbf{v}_c^{(k)}) = \text{supp}(\mathbf{z}_c^{(k-1)})$  and  $h_{\gamma,c}$  satisfies  $h_{\gamma,c}((1 - \tau)\mathbf{u} + \tau\mathbf{v}) \leq (1 - \tau)h_{\gamma,c}(\mathbf{u}) + \tau h_{\gamma,c}(\mathbf{v})$  for any two vectors  $\mathbf{u}, \mathbf{v}$  with  $\text{supp}(\mathbf{u}_c) = \text{supp}(\mathbf{v}_c)$  and any  $\tau \in (0, 1)$ .  $\textcircled{2}$  is due to the fact that  $\mathbf{m}^{(k)} - (1 - \alpha_k)\mathbf{z}^{(k-1)} - \alpha_k\mathbf{v}^{(k)} = \alpha_k(\mathbf{v}^{(k-1)} - \mathbf{v}^{(k)})$  according to eq.(9) in Algorithm 1.

Computing  $\alpha_k \times (7) + (12)$ , we have

$$\begin{aligned} & \langle \nabla f(\mathbf{m}^{(k)}), \mathbf{z}^{(k)} - (1 - \alpha_k)\mathbf{z}^{(k-1)} - \alpha_k\mathbf{z} \rangle + h_{\gamma,c}(\mathbf{z}^{(k)}) \\ & \leq (1 - \alpha_k)h_{\gamma,c}(\mathbf{z}^{(k-1)}) + \alpha_k h_{\gamma,c}(\mathbf{z}) \\ & \quad + \frac{\alpha_k}{2\lambda_k} \left( \|\mathbf{v}^{(k-1)} - \mathbf{z}\|_2^2 - \|\mathbf{v}^{(k)} - \mathbf{z}\|_2^2 \right) + \left( \frac{\alpha_k^2}{2s} - \frac{\alpha_k}{2\lambda_k} \right) \|\mathbf{v}^{(k)} - \mathbf{v}^{(k-1)}\|_2^2 - \frac{1}{2s} \|\mathbf{z}^{(k)} - \mathbf{m}^{(k)}\|_2^2 \\ & \stackrel{\textcircled{1}}{\leq} (1 - \alpha_k)h_{\gamma,c}(\mathbf{z}^{(k-1)}) + \alpha_k h_{\gamma,c}(\mathbf{z}) + \frac{\alpha_k}{2\lambda_k} \left( \|\mathbf{v}^{(k-1)} - \mathbf{z}\|_2^2 - \|\mathbf{v}^{(k)} - \mathbf{z}\|_2^2 \right) - \frac{1}{2s} \|\mathbf{z}^{(k)} - \mathbf{m}^{(k)}\|_2^2, \end{aligned} \quad (13)$$

and  $\textcircled{1}$  is due to  $\lambda_k \alpha_k \leq s$ .

Combining (3), (4) and (13), and noting that  $\tilde{F}(\mathbf{z}) = f(\mathbf{z}) + h_{\gamma,c}(\mathbf{z})$ , we have

$$\begin{aligned} \tilde{F}(\mathbf{z}^{(k)}) & \leq (1 - \alpha_k)\tilde{F}(\mathbf{z}^{(k-1)}) + \alpha_k \tilde{F}(\mathbf{z}) - \left( \frac{1}{2s} - \frac{L_f}{2} \right) \|\mathbf{z}^{(k)} - \mathbf{m}^{(k)}\|_2^2 \\ & \quad + \frac{\alpha_k}{2\lambda_k} \left( \|\mathbf{v}^{(k-1)} - \mathbf{z}\|_2^2 - \|\mathbf{v}^{(k)} - \mathbf{z}\|_2^2 \right). \end{aligned} \quad (14)$$

It follows by (14) that

$$\begin{aligned} \tilde{F}(\mathbf{z}^{(k)}) - \tilde{F}(\mathbf{z}) & \leq (1 - \alpha_k) \left( \tilde{F}(\mathbf{z}^{(k-1)}) - \tilde{F}(\mathbf{z}) \right) \\ & \quad - \left( \frac{1}{2s} - \frac{L_f}{2} \right) \|\mathbf{z}^{(k)} - \mathbf{m}^{(k)}\|_2^2 + \frac{\alpha_k}{2\lambda_k} \left( \|\mathbf{v}^{(k-1)} - \mathbf{z}\|_2^2 - \|\mathbf{v}^{(k)} - \mathbf{z}\|_2^2 \right). \end{aligned} \quad (15)$$

Define a sequence  $\{T_k\}_{k=1}^{\infty}$  as  $T_1 = 1$ , and  $T_k = (1 - \alpha_k)T_{k-1}$  for  $k \geq 2$ . Dividing both sides of (15) by  $T_k$ , we have

$$\begin{aligned} \frac{\tilde{F}(\mathbf{z}^{(k)}) - \tilde{F}(\mathbf{z})}{T_k} &\leq \frac{\tilde{F}(\mathbf{z}^{(k-1)}) - \tilde{F}(\mathbf{z})}{T_{k-1}} - \frac{1 - L_f s}{2sT_k} \left\| \mathbf{z}^{(k)} - \mathbf{m}^{(k)} \right\|_2^2 \\ &\quad + \frac{\alpha_k}{2\lambda_k T_k} \left( \left\| \mathbf{v}^{(k-1)} - \mathbf{z} \right\|_2^2 - \left\| \mathbf{v}^{(k)} - \mathbf{z} \right\|_2^2 \right). \end{aligned} \quad (16)$$

Since we choose  $\alpha_k = \frac{2}{k+1}$ , it follows that  $T_k = \frac{2}{k(k+1)}$  for all  $k \geq 1$ . Plugging the values of  $\alpha_k$  and  $T_k$  in  $\frac{\alpha_k}{2\lambda_k T_k}$  in (16), we have

$$\begin{aligned} \frac{\tilde{F}(\mathbf{z}^{(k)}) - \tilde{F}(\mathbf{z})}{T_k} &\leq \frac{\tilde{F}(\mathbf{z}^{(k-1)}) - \tilde{F}(\mathbf{z})}{T_{k-1}} - \frac{1 - L_f s}{2sT_k} \left\| \mathbf{z}^{(k)} - \mathbf{m}^{(k)} \right\|_2^2 \\ &\quad + \frac{k}{2\lambda_k} \left( \left\| \mathbf{v}^{(k-1)} - \mathbf{z} \right\|_2^2 - \left\| \mathbf{v}^{(k)} - \mathbf{z} \right\|_2^2 \right) \\ &\stackrel{\textcircled{1}}{\leq} \frac{\tilde{F}(\mathbf{z}^{(k-1)}) - \tilde{F}(\mathbf{z})}{T_{k-1}} - \frac{1 - L_f s}{2sT_k} \left\| \mathbf{z}^{(k)} - \mathbf{m}^{(k)} \right\|_2^2 + \frac{k}{2\lambda_k} \left\| \mathbf{v}^{(k-1)} - \mathbf{z} \right\|_2^2 \\ &\quad - \frac{k+1}{2\lambda_{k+1}} \left\| \mathbf{v}^{(k)} - \mathbf{z} \right\|_2^2, \end{aligned} \quad (17)$$

where  $\textcircled{1}$  is due to the condition that  $\lambda_{k+1} \geq \frac{k+1}{k}\lambda_k$  for  $k \geq 1$ .

Set  $k_0 = k' + 1$ . Summing the above inequality for  $k = k_0, \dots, m$  with  $m \geq k_0$ , we have

$$\begin{aligned} \frac{\tilde{F}(\mathbf{z}^{(m)}) - \tilde{F}(\mathbf{z})}{T_m} &\leq \frac{\tilde{F}(\mathbf{z}^{(k_0-1)}) - \tilde{F}(\mathbf{z})}{T_{k_0-1}} + \frac{k_0 \left\| \mathbf{v}^{(k_0-1)} - \mathbf{z} \right\|_2^2}{2\lambda_{k_0}} - \sum_{k=k_0}^m \frac{1 - L_f s}{2sT_k} \left\| \mathbf{z}^{(k)} - \mathbf{m}^{(k)} \right\|_2^2 \\ &\leq \frac{k_0(k_0 - 1) \left( \tilde{F}(\mathbf{z}^{(k_0-1)}) - \tilde{F}(\mathbf{z}) \right)}{2} + \frac{\left\| \mathbf{v}^{(k_0-1)} - \mathbf{z} \right\|_2^2}{2\eta}. \end{aligned} \quad (18)$$

Since  $T_m = \frac{2}{m(m+1)}$ , it follows by (18) with  $z = z^*$  that

$$\tilde{F}(\mathbf{z}^{(m)}) - \tilde{F}(\mathbf{z}^*) \leq \frac{1}{m(m+1)} \cdot \left( k_0(k_0 - 1) \left( \tilde{F}(\mathbf{z}^{(k_0-1)}) - \tilde{F}(\mathbf{z}^*) \right) + \frac{\left\| \mathbf{v}^{(k_0-1)} - \mathbf{z}^* \right\|_2^2}{\eta} \right). \quad (19)$$

Changing  $m$  to  $k$  in (19) completes the proof. □

## 2 ADDITIONAL ILLUSTRATION

Figure 1 illustrates the comparison between the weighed adjacency matrix of  $\ell^1$ -graph and SRSG.

### References

- D.J. Newman A. Asuncion. UCI machine learning repository, 2007.
- D. Plummer and L. Lovász. *Matching Theory*. North-Holland Mathematics Studies. Elsevier Science, 1986.
- Xin Zheng, Deng Cai, Xiaofei He, Wei-Ying Ma, and Xueyin Lin. Locality preserving clustering for image database. In *Proceedings of the 12th Annual ACM International Conference on Multimedia*, MULTIMEDIA '04, pages 885–891, New York, NY, USA, 2004. ACM.

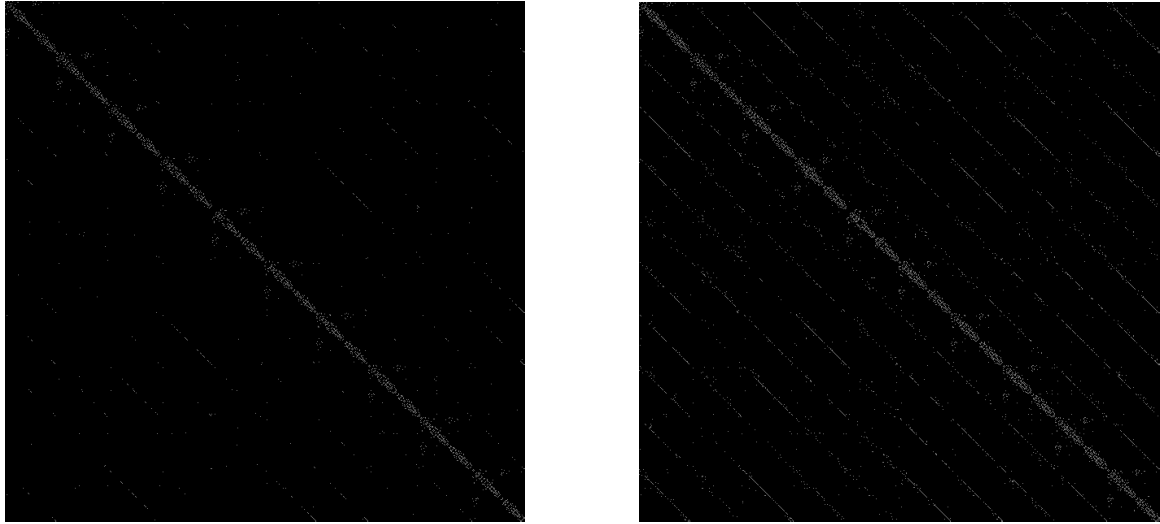

Figure 1: The comparison between the weighed adjacency matrix  $W$  of the sparse graph produced by  $\ell^1$ -graph (right) and SRSG (left) on the Extended Yale Face Database B, where each white dot indicates an edge in the sparse graph.
