# Supplementary material
Source: ML conference proceedings conference paper supplement (https://openreview.net/forum?id=-ShKZHg0Md9)

# Accuracy w.r.t. $K$ on UMIST

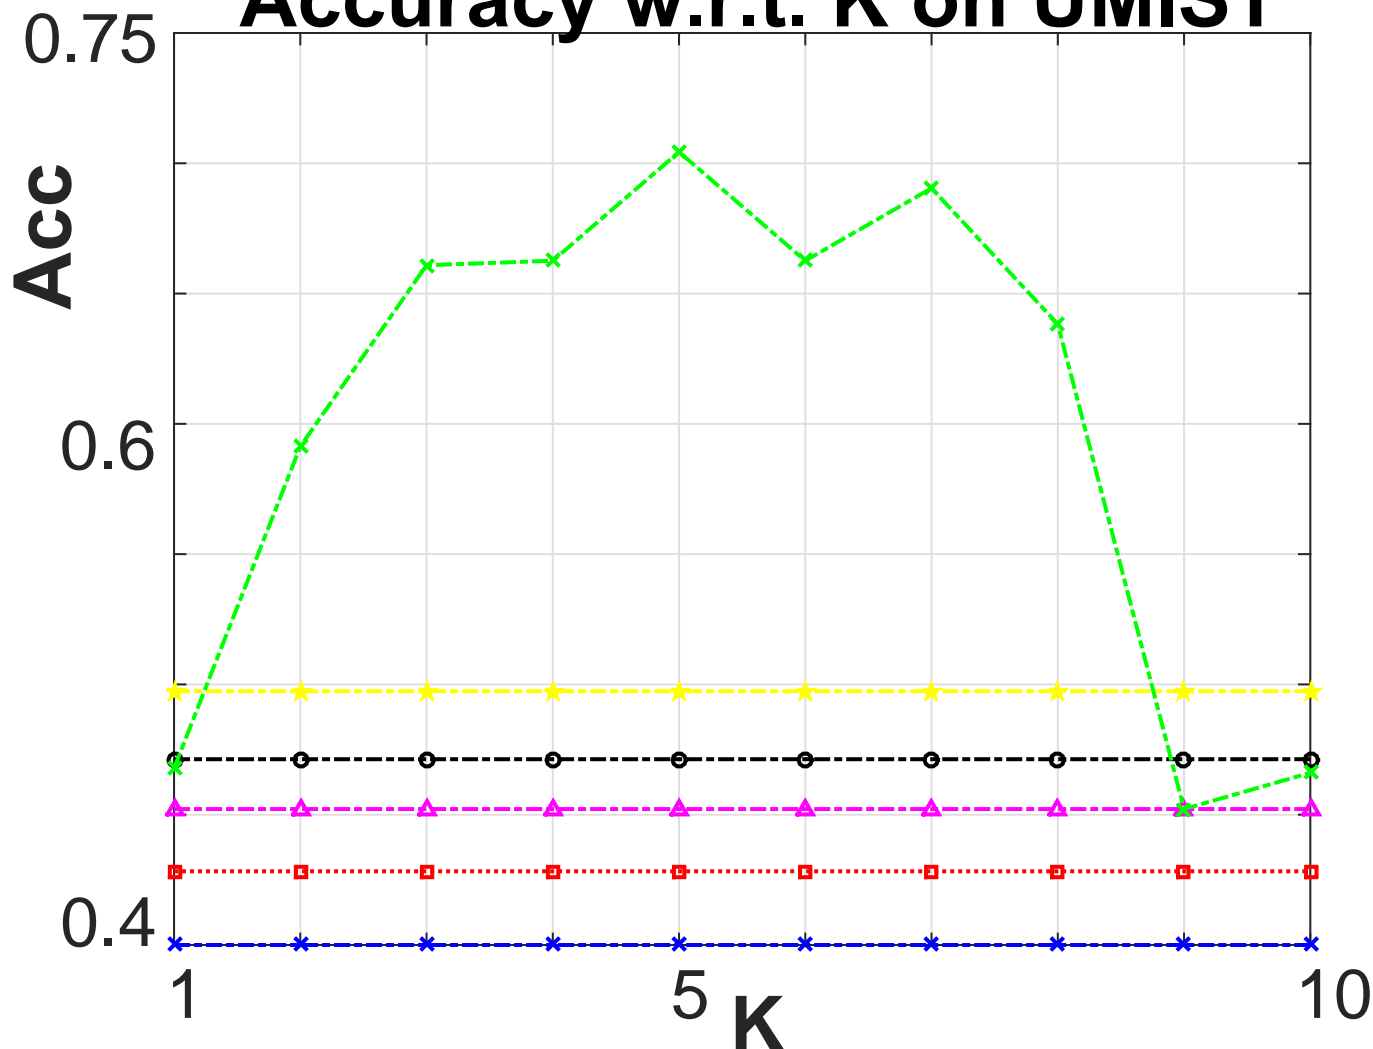

Supplement: supplementary_material [file attachment]

# NMI w.r.t. $\gamma$ on UMIST

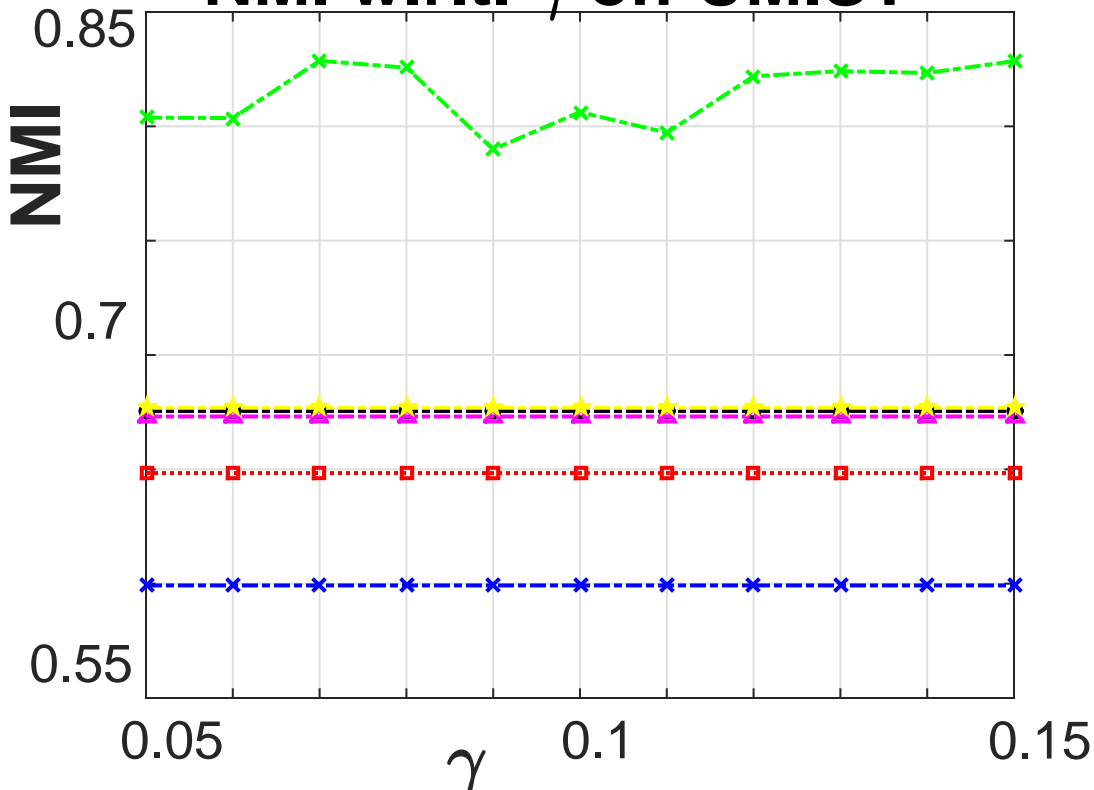

Supplement: supplementary_material [file attachment]

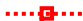

KM

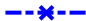

SC

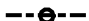

l1-graph

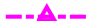

SMCE

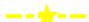

LG-l1-graph

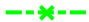

SRSG

Supplement: supplementary_material [file attachment]

# NMI w.r.t. $K$ on UMIST

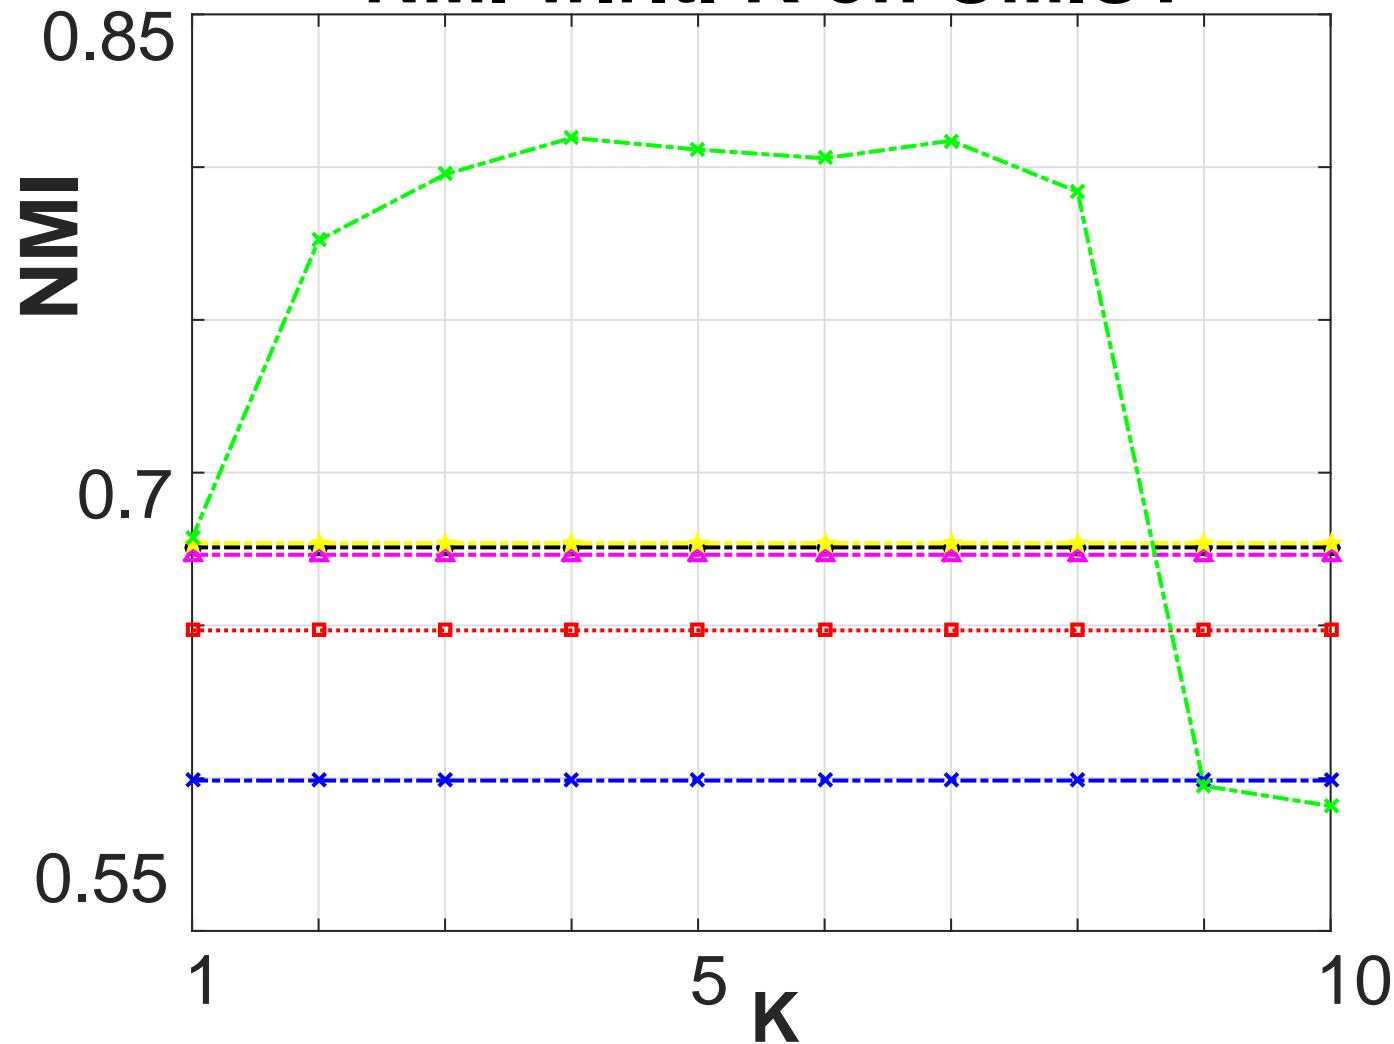

Supplement: supplementary_material [file attachment]

# Accuracy w.r.t. $\gamma$ on UMIST

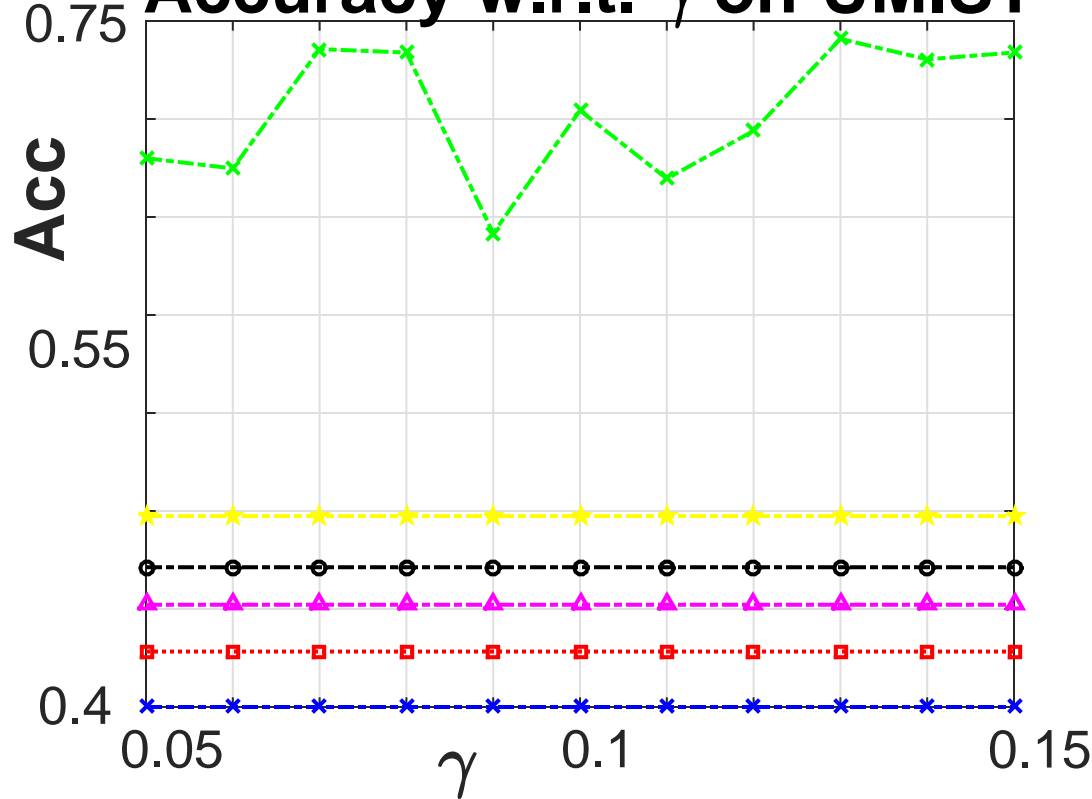

Supplement: supplementary_material [file attachment]

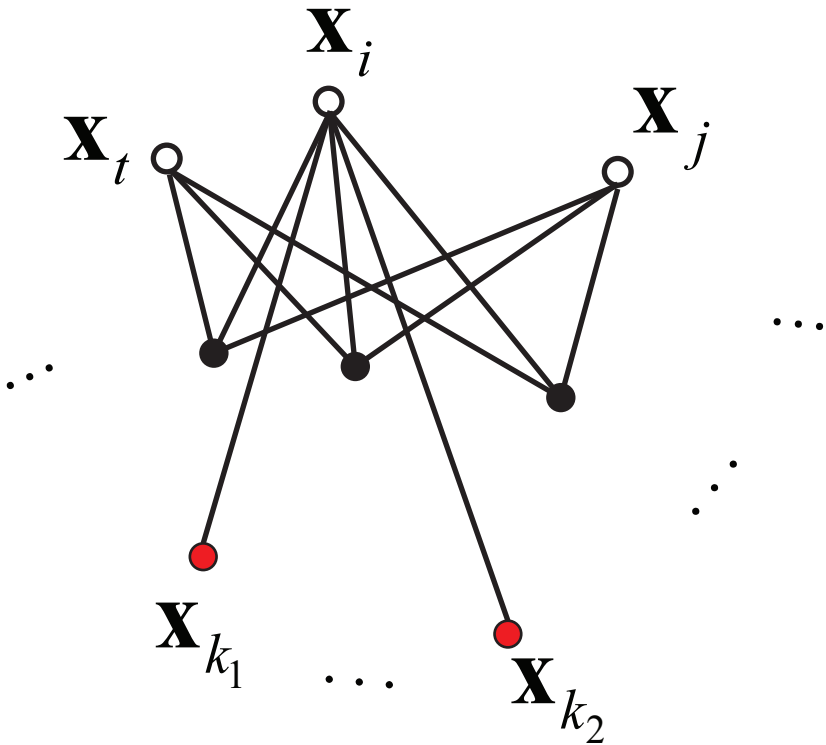

Supplement: supplementary_material [file attachment]

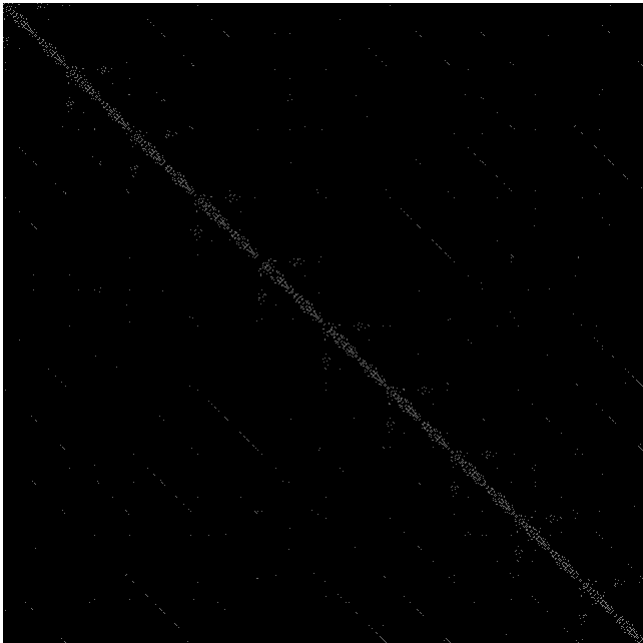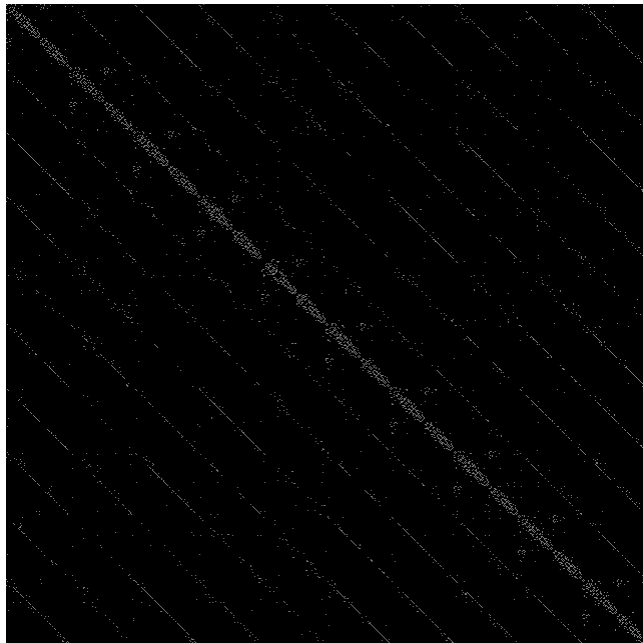

Supplement: supplementary_material [file attachment]
